# Supplementary material
Source: HighWire-hosted journal article supplement (https://bmjopen.bmj.com/content/10/10/e034136)
Supplement: inline-supplementary-material-1 [file inline-supplementary-material-1.pdf]

## Supplementary tables for ADONIX: Lung function and source specific PM

**Table S1 Correlation (Pearson's) matrix of exposure**

|                   |                     | PM <sub>10</sub> |         |              |                |          | PM <sub>2.5</sub> |         |              |                |          | PM <sub>BC</sub> |         |              |                |          |
|-------------------|---------------------|------------------|---------|--------------|----------------|----------|-------------------|---------|--------------|----------------|----------|------------------|---------|--------------|----------------|----------|
|                   |                     | Total            | Traffic | Res. heating | Marine traffic | Industry | Total             | Traffic | Res. heating | Marine traffic | Industry | Total            | Traffic | Res. heating | Marine traffic | Industry |
| PM <sub>10</sub>  | Total               | 1                |         |              |                |          |                   |         |              |                |          |                  |         |              |                |          |
|                   | Traffic             | 0.75*            | 1       |              |                |          |                   |         |              |                |          |                  |         |              |                |          |
|                   | Residential heating | -0.43            | -0.70*  | 1            |                |          |                   |         |              |                |          |                  |         |              |                |          |
|                   | Marine traffic      | 0.06             | 0.44    | -0.83*       | 1              |          |                   |         |              |                |          |                  |         |              |                |          |
|                   | Industry            | -0.32            | 0.30    | -0.60*       | 0.63*          | 1        |                   |         |              |                |          |                  |         |              |                |          |
| PM <sub>2.5</sub> | Total               | 0.89*            | 0.37    | -0.12        | -0.22          | -0.66*   | 1                 |         |              |                |          |                  |         |              |                |          |
|                   | Traffic             | 0.77*            | 1*      | -0.70*       | 0.43           | 0.27     | 0.40              | 1       |              |                |          |                  |         |              |                |          |
|                   | Residential heating | -0.43            | -0.70*  | 1*           | -0.83*         | -0.60*   | -0.12             | -0.70*  | 1            |                |          |                  |         |              |                |          |
|                   | Marine traffic      | 0.06             | 0.44    | -0.83*       | 1*             | 0.63*    | -0.22             | 0.43    | -0.83*       | 1              |          |                  |         |              |                |          |
|                   | Industry            | -0.23            | 0.29    | -0.70*       | 0.72*          | 0.94*    | -0.54*            | 0.27    | -0.70*       | 0.72*          | 1        |                  |         |              |                |          |
| PM <sub>BC</sub>  | Total               | 0.83*            | 0.98*   | -0.59*       | 0.32*          | 0.13     | 0.49              | 0.99*   | -0.59*       | 0.32           | 0.13     | 1                |         |              |                |          |
|                   | Traffic             | 0.83*            | 0.99*   | -0.69*       | 0.40*          | 0.19     | 0.48              | 1*      | -0.69*       | 0.40           | 0.21     | 0.99*            | 1       |              |                |          |
|                   | Residential heating | -0.41            | -0.69*  | 1*           | -0.83*         | -0.62*   | -0.09             | -0.69*  | 1*           | -0.83*         | -0.73*   | -0.58*           | -0.68*  | 1            |                |          |
|                   | Marine traffic      | 0.08             | 0.45    | -0.83*       | 1*             | 0.62*    | -0.20             | 0.44    | -0.83*       | 1*             | 0.71*    | 0.33             | 0.41    | -0.83*       | 1              |          |
|                   | Industry            | -0.24            | 0.29    | -0.70*       | 0.72*          | 0.94*    | -0.54*            | 0.27    | -0.70*       | 0.72*          | 1*       | 0.13             | 0.21    | -0.72*       | 0.70*          | 1        |

\* p&lt;0.05

Supplementary tables for ADONIX: Lung function and source specific PM

**Table S2 Trends in change in FEV<sub>1</sub> and FVC (% predicted) across exposure strata from low (0-50<sup>th</sup> percentile) to high (above 90<sup>th</sup> percentile) concentrations of source-specific PM (Figure 1)**

|                         | FEV <sub>1</sub> |        |       |             | FVC          |        |       |             |
|-------------------------|------------------|--------|-------|-------------|--------------|--------|-------|-------------|
|                         | $\beta$          | 95% CI |       | $p$         | $\beta$      | 95% CI |       | $p$         |
|                         |                  | Lower  | Upper |             |              | Lower  | Upper |             |
| <b>PM<sub>10</sub></b>  |                  |        |       |             |              |        |       |             |
| Total                   | -0.37            | -0,97  | 0,22  | 0.22        | <b>-0.73</b> | -1,27  | -0,19 | <b>0.01</b> |
| Traffic                 | <b>-0.85</b>     | -1,51  | -0,19 | <b>0.01</b> | <b>-0.81</b> | -1,40  | -0,21 | <b>0.01</b> |
| Residential             |                  |        |       |             |              |        |       |             |
| heating                 | -0.21            | -0,79  | 0,37  | 0.47        | 0.15         | -0,38  | 0,67  | 0.59        |
| Marine traffic          | 0.08             | -0,54  | 0,71  | 0.32        | -0.24        | -0,81  | 0,32  | 0.29        |
| Industry                | -0.29            | -0,91  | 0,33  | 0.36        | -0.22        | -0,79  | 0,35  | 0.45        |
| <b>PM<sub>2.5</sub></b> |                  |        |       |             |              |        |       |             |
| Total                   | -0.03            | -0,60  | 0,54  | 0.92        | -0.47        | -0,98  | 0,05  | 0.08        |
| Traffic                 | <b>-0.79</b>     | -1,45  | -0,13 | <b>0.02</b> | <b>-0.81</b> | -1,41  | -0,21 | 0.01        |
| Residential             |                  |        |       |             |              |        |       |             |
| heating                 | -0.18            | -0,77  | 0,40  | 0.53        | 0.15         | -0,37  | 0,68  | 0.57        |
| Marine traffic          | 0.08             | -0,54  | 0,71  | 0.32        | -0.24        | -0,81  | 0,32  | 0.29        |
| Industry                | -0.12            | -0,76  | 0,53  | 0.72        | 0.03         | -0,55  | 0,62  | 0.91        |
| <b>PM<sub>BC</sub></b>  |                  |        |       |             |              |        |       |             |
| Total                   | <b>-0.66</b>     | -1,30  | -0,01 | <b>0.05</b> | -0.75        | -1,34  | -0,17 | 0.01        |
| Traffic                 | -0.57            | -1,22  | 0,09  | 0.09        | -0.75        | -1,34  | -0,16 | 0.01        |
| Residential             |                  |        |       |             |              |        |       |             |
| heating                 | -0.02            | -0,61  | 0,58  | 0.95        | 0.39         | -0,15  | 0,93  | 0.16        |
| Marine traffic          | 0.03             | -0,61  | 0,67  | 0.33        | -0.34        | -0,91  | 0,24  | 0.30        |
| Industry                | -0.22            | -0,86  | 0,42  | 0.49        | -0.03        | -0,61  | 0,55  | 0.92        |

ORs from regression models adjusted for age, weight, education, area of residence, smoking status and exposure to environmental tobacco smoke in the last 12 months.

Supplementary tables for ADONIX: Lung function and source specific PM

**Table S3 Change in FEV<sub>1</sub> and FVC (mL) per IQR change in PM exposure**

|                         | IQR ( $\mu\text{g}/\text{m}^3$ ) | $\beta$    | FEV <sub>1</sub> |              | $\beta$    | FVC          |              |
|-------------------------|----------------------------------|------------|------------------|--------------|------------|--------------|--------------|
|                         |                                  |            | 95% CI           |              |            | 95% CI       |              |
|                         |                                  |            | <i>Lower</i>     | <i>Upper</i> |            | <i>Lower</i> | <i>Upper</i> |
| <b>PM<sub>10</sub></b>  |                                  |            |                  |              |            |              |              |
| Total                   | 3.05                             | -23        | -46              | 0            | -11        | -30          | 8            |
| Traffic                 | 1.64                             | <b>-23</b> | <b>-43</b>       | <b>-4</b>    | <b>-20</b> | <b>-36</b>   | <b>-4</b>    |
| Residential heating     | 0.62                             | 4          | -20              | 28           | -7         | -27          | 12           |
| Marine traffic          | 0.03                             | 4          | -8               | 16           | 4          | -6           | 13           |
| Industry                | 0.10                             | <b>-26</b> | <b>-47</b>       | <b>-5</b>    | <b>-18</b> | <b>-35</b>   | <b>-1</b>    |
| <b>PM<sub>2.5</sub></b> |                                  |            |                  |              |            |              |              |
| Total                   | 2.47                             | <b>-28</b> | <b>-54</b>       | <b>-3</b>    | -5         | -26          | 15           |
| Traffic                 | 0.52                             | <b>-24</b> | <b>-43</b>       | <b>-5</b>    | <b>-20</b> | <b>-36</b>   | <b>-4</b>    |
| Residential heating     | 0.62                             | 4          | -20              | 28           | -7         | -27          | 12           |
| Marine traffic          | 0.03                             | 4          | -38              | 46           | 4          | -30          | 38           |
| Industry                | 0.06                             | <b>-24</b> | <b>-49</b>       | <b>0</b>     | <b>-18</b> | <b>-38</b>   | <b>2</b>     |
| <b>PM<sub>BC</sub></b>  |                                  |            |                  |              |            |              |              |
| Total                   | 0.33                             | <b>-29</b> | <b>-50</b>       | <b>-8</b>    | <b>-25</b> | <b>-42</b>   | <b>-7</b>    |
| Traffic                 | 0.25                             | <b>-24</b> | <b>-42</b>       | <b>-6</b>    | <b>-18</b> | <b>-33</b>   | <b>-4</b>    |
| Residential heating     | 0.07                             | 4          | -21              | 28           | -11        | -31          | 8            |
| Marine traffic          | 0.01                             | 3          | -8               | 15           | 3          | -6           | 13           |
| Industry                | 0.01                             | <b>-27</b> | <b>-51</b>       | <b>-2</b>    | <b>-20</b> | <b>-40</b>   | <b>0</b>     |

Change estimated from linear regression models adjusted for age, weight, education, area of residence, smoking status and exposure to environmental tobacco smoke in the last 12 months

Supplementary tables for ADONIX: Lung function and source specific PM

**Table S4 Odds ratio of having FEV<sub>1</sub> and FVC below LLN in medium and high exposure strata by PM source and size fraction\***

| Model                   | Percentile                          | LLN FEV <sub>1</sub> |                 |             |             | LLN FVC     |                 |             |             |
|-------------------------|-------------------------------------|----------------------|-----------------|-------------|-------------|-------------|-----------------|-------------|-------------|
|                         |                                     | OR                   | 95% CI<br>lower | upper       | p           | OR          | 95% CI<br>lower | upper       | p           |
| <b>PM<sub>10</sub></b>  |                                     |                      |                 |             |             |             |                 |             |             |
| Total                   | 0-50 <sup>th</sup>                  | -                    | -               | -           | -           |             |                 |             |             |
|                         | 50 <sup>th</sup> -90 <sup>th</sup>  | 1.05                 | 0.87            | 1.26        | 0.61        | <b>1.23</b> | <b>1.00</b>     | <b>1.51</b> | <b>0.05</b> |
|                         | 90 <sup>th</sup> -100 <sup>th</sup> | 1.18                 | 0.86            | 1.62        | 0.31        | <b>1.40</b> | <b>0.98</b>     | <b>1.99</b> | <b>0.06</b> |
| Traffic                 | 0-50 <sup>th</sup>                  | ref                  | -               | -           | -           | ref         | -               | -           | -           |
|                         | 50 <sup>th</sup> -90 <sup>th</sup>  | 1.12                 | 0.92            | 1.36        | 0.28        | 1.16        | 0.93            | 1.45        | 0.18        |
|                         | 90 <sup>th</sup> -100 <sup>th</sup> | <b>1.46</b>          | <b>1.06</b>     | <b>2.02</b> | <b>0.02</b> | <b>1.45</b> | <b>1.00</b>     | <b>2.08</b> | <b>0.05</b> |
| Residential heating     | 0-50 <sup>th</sup>                  | ref                  | -               | -           | -           |             | ref             | -           | -           |
|                         | 50 <sup>th</sup> -90 <sup>th</sup>  | 1.04                 | 0.87            | 1.25        | 0.65        | 1.02        | 0.83            | 1.25        | 0.87        |
|                         | 90 <sup>th</sup> -100 <sup>th</sup> | 0.90                 | 0.66            | 1.25        | 0.54        | 0.69        | 0.47            | 1.01        | 0.06        |
| Marine traffic          | 0-50 <sup>th</sup>                  | ref                  | -               | -           | -           | ref         | -               | -           | -           |
|                         | 50 <sup>th</sup> -90 <sup>th</sup>  | 0.98                 | 0.81            | 1.18        | 0.82        | 1.01        | 0.82            | 1.26        | 0.89        |
|                         | 90 <sup>th</sup> -100 <sup>th</sup> | 0.83                 | 0.59            | 1.17        | 0.29        | 0.91        | 0.62            | 1.33        | 0.64        |
| Industry                | 0-50 <sup>th</sup>                  | ref                  | -               | -           | -           | ref         | -               | -           | -           |
|                         | 50 <sup>th</sup> -90 <sup>th</sup>  | 0.99                 | 0.81            | 1.22        | 0.95        | 1.03        | 0.82            | 1.30        | 0.79        |
|                         | 90 <sup>th</sup> -100 <sup>th</sup> | 0.97                 | 0.71            | 1.32        | 0.85        | 1.13        | 0.79            | 1.61        | 0.49        |
| <b>PM<sub>2.5</sub></b> |                                     |                      |                 |             |             |             |                 |             |             |
| Total                   | 0-50 <sup>th</sup>                  |                      |                 |             |             |             |                 |             |             |
|                         | 50 <sup>th</sup> -90 <sup>th</sup>  | 0.97                 | 0.81            | 1.16        | 0.76        | 1.03        | 0.84            | 1.26        | 0.77        |
|                         | 90 <sup>th</sup> -100 <sup>th</sup> | 1.07                 | 0.79            | 1.46        | 0.66        | 1.31        | 0.94            | 1.82        | 0.11        |
| Traffic                 | 0-50 <sup>th</sup>                  | ref                  | -               | -           | -           |             |                 |             |             |
|                         | 50 <sup>th</sup> -90 <sup>th</sup>  | 1.13                 | 0.93            | 1.38        | 0.22        | 1.21        | 0.97            | 1.51        | 0.09        |
|                         | 90 <sup>th</sup> -100 <sup>th</sup> | <b>1.47</b>          | <b>1.06</b>     | <b>2.03</b> | <b>0.02</b> | <b>1.54</b> | <b>1.07</b>     | <b>2.21</b> | <b>0.02</b> |
| Residential heating     | 0-50 <sup>th</sup>                  | ref                  | -               | -           | -           | ref         | -               | -           | -           |
|                         | 50 <sup>th</sup> -90 <sup>th</sup>  | 1.03                 | 0.85            | 1.23        | 0.79        | 1.02        | 0.83            | 1.25        | 0.87        |
|                         | 90 <sup>th</sup> -100 <sup>th</sup> | 0.90                 | 0.65            | 1.23        | 0.50        | 0.69        | 0.47            | 1.01        | 0.06        |
| Marine traffic          | 0-50 <sup>th</sup>                  | ref                  | -               | -           | -           | ref         | -               | -           | -           |
|                         | 50 <sup>th</sup> -90 <sup>th</sup>  | 0.98                 | 0.81            | 1.18        | 0.82        | 1.01        | 0.82            | 1.26        | 0.89        |
|                         | 90 <sup>th</sup> -100 <sup>th</sup> | 0.83                 | 0.59            | 1.17        | 0.29        | 0.91        | 0.62            | 1.33        | 0.64        |
| Industry                | 0-50 <sup>th</sup>                  |                      |                 |             |             | ref         | -               | -           | -           |
|                         | 50 <sup>th</sup> -90 <sup>th</sup>  | 0.91                 | 0.74            | 1.12        | 0.38        | 1.03        | 0.82            | 1.30        | 0.79        |

Supplementary tables for ADONIX: Lung function and source specific PM

|                        |                                     |      |      |      |      |             |             |             |             |
|------------------------|-------------------------------------|------|------|------|------|-------------|-------------|-------------|-------------|
| <b>PM<sub>BC</sub></b> | 90 <sup>th</sup> -100 <sup>th</sup> | 0.97 | 0.71 | 1.33 | 0.83 | 1.13        | 0.79        | 1.61        | 0.49        |
|                        | Total                               |      |      |      |      | ref         | -           | -           |             |
| Traffic                | 0-50 <sup>th</sup>                  |      |      |      |      | 1.07        | 0.86        | 1.32        | 0.56        |
|                        | 50 <sup>th</sup> -90 <sup>th</sup>  | 1.08 | 0.89 | 1.31 | 0.44 | <b>1.46</b> | <b>1.02</b> | <b>2.09</b> | <b>0.04</b> |
|                        | 90 <sup>th</sup> -100 <sup>th</sup> | 1.34 | 0.97 | 1.86 | 0.08 |             |             |             |             |
|                        | 0-50 <sup>th</sup>                  | ref  | -    | -    | -    |             |             |             |             |
| Residential heating    | 50 <sup>th</sup> -90 <sup>th</sup>  | 1.17 | 0.96 | 1.42 | 0.12 | 1.19        | 0.95        | 1.48        | 0.13        |
|                        | 90 <sup>th</sup> -100 <sup>th</sup> | 1.37 | 0.98 | 1.90 | 0.06 | <b>1.55</b> | <b>1.08</b> | <b>2.23</b> | <b>0.02</b> |
|                        | 0-50 <sup>th</sup>                  | ref  | -    | -    | -    | ref         | -           | -           |             |
|                        | 50 <sup>th</sup> -90 <sup>th</sup>  | 1.09 | 0.90 | 1.30 | 0.38 | 0.94        | 0.76        | 1.15        | 0.54        |
| Marine traffic         | 90 <sup>th</sup> -100 <sup>th</sup> | 0.80 | 0.57 | 1.11 | 0.18 | <b>0.64</b> | <b>0.44</b> | <b>0.94</b> | <b>0.02</b> |
|                        | 0-50 <sup>th</sup>                  | ref  | -    | -    |      | ref         | -           | -           |             |
|                        | 50 <sup>th</sup> -90 <sup>th</sup>  | 1.00 | 0.82 | 1.21 | 0.96 | 1.00        | 0.81        | 1.25        | 0.98        |
| Industry               | 90 <sup>th</sup> -100 <sup>th</sup> | 0.89 | 0.64 | 1.26 | 0.52 | 0.94        | 0.64        | 1.37        | 0.75        |
|                        | 0-50 <sup>th</sup>                  |      |      |      |      | ref         | -           | -           |             |
|                        | 50 <sup>th</sup> -90 <sup>th</sup>  | 0.96 | 0.78 | 1.17 | 0.67 | 1.05        | 0.84        | 1.32        | 0.68        |
|                        | 90 <sup>th</sup> -100 <sup>th</sup> | 0.99 | 0.72 | 1.35 | 0.95 | 1.09        | 0.77        | 1.56        | 0.62        |

ORs from regression models adjusted for age, weight, education, area of residence, smoking status and exposure to environmental tobacco smoke in the last 12 months. FEV<sub>1</sub>, forced expiratory volume in 1 second, FVC, forced vital capacity, LLN, lower limit of normal, the fifth percentile of a healthy population, according to formula from Brisman et al., 2017.

Supplementary tables for ADONIX: Lung function and source specific PM

**Table S5 Genetic main effects: Changes in FEV<sub>1</sub> and FVC in minor allele carriers relative to major allele carriers of GSTP, GSTT and SP-A SNPs**

|                  | N (%)       | $\beta$       | FEV <sub>1</sub> |              |              | p             | FVC           |               |              | p |
|------------------|-------------|---------------|------------------|--------------|--------------|---------------|---------------|---------------|--------------|---|
|                  |             |               | 95% CI           |              | p            |               | 95% CI        |               | p            |   |
|                  |             |               | Lower            | Upper        |              |               | Lower         | Upper         |              |   |
| <b>GSTP</b>      |             |               |                  |              |              |               |               |               |              |   |
| <b>rs1138272</b> |             |               |                  |              |              |               |               |               |              |   |
| (TT+CT)          | 707 (14.3)  |               |                  |              |              |               |               |               |              |   |
| vs CC            | 4250 (85.7) | 0.513         | -0.539           | 1.565        | 0.339        | 0.790         | -0.161        | 1.741         | 0.103        |   |
| <b>rs596603</b>  |             |               |                  |              |              |               |               |               |              |   |
| (TT+GT)          | 3363 (68.0) |               |                  |              |              |               |               |               |              |   |
| vs GG            | 1581 (32.0) | -0.336        | -1.126           | 0.455        | 0.405        | -0.216        | -0.931        | 0.499         | 0.554        |   |
| <b>rs762803</b>  |             |               |                  |              |              |               |               |               |              |   |
| (AA+AC)          | 3309 (67.0) |               |                  |              |              |               |               |               |              |   |
| vs CC            | 1633 (33.0) | <b>-0.802</b> | <b>-1.583</b>    | <b>-0.02</b> | <b>0.044</b> | <b>-0.736</b> | <b>-1.443</b> | <b>-0.028</b> | <b>0.042</b> |   |
| <b>rs1695</b>    |             |               |                  |              |              |               |               |               |              |   |
| (AG+GG)          | 2683 (54.4) |               |                  |              |              |               |               |               |              |   |
| vs AA            | 2244 (45.5) | <b>-0.902</b> | <b>-1.643</b>    | <b>-0.16</b> | <b>0.017</b> | -0.575        | -1.246        | 0.095         | 0.093        |   |
| <b>GSTT</b>      |             |               |                  |              |              |               |               |               |              |   |
| <b>rs2266637</b> |             |               |                  |              |              |               |               |               |              |   |
| GG               | 1005 (23.8) |               |                  |              |              |               |               |               |              |   |
| vs CC            | 3219 (76.2) | -0.378        | -1.331           | 0.575        | 0.437        | <b>-1.431</b> | <b>-2.293</b> | <b>-0.57</b>  | <b>0.001</b> |   |
| <b>SP-A 1</b>    |             |               |                  |              |              |               |               |               |              |   |
| <b>rs1136450</b> |             |               |                  |              |              |               |               |               |              |   |
| (CC+GC)          | 2926 (63.8) |               |                  |              |              |               |               |               |              |   |
| vs GG            | 1660 (36.2) | -0.106        | -0.899           | 0.704        | 0.807        | -0.106        | -0.832        | 0.62          | 0.774        |   |
| <b>rs1136451</b> |             |               |                  |              |              |               |               |               |              |   |
| (GG+GA)          | 1352 (29.7) |               |                  |              |              |               |               |               |              |   |
| vs AA            | 3195 (70.3) | 0.498         | -0.348           | 1.345        | 0.248        | 0.257         | -0.51         | 1.023         | 0.511        |   |
| <b>rs1059057</b> |             |               |                  |              |              |               |               |               |              |   |
| (GG + GA)        | 579 (12.6)  |               |                  |              |              |               |               |               |              |   |
| vs AA            | 4018 (87.4) | 0.155         | -1.003           | 1.313        | 0.793        | 0.073         | -0.977        | 1.124         | 0.891        |   |
| <b>rs4253527</b> |             |               |                  |              |              |               |               |               |              |   |

## Supplementary tables for ADONIX: Lung function and source specific PM

|                    |                  |             |        |        |       |       |        |        |       |       |
|--------------------|------------------|-------------|--------|--------|-------|-------|--------|--------|-------|-------|
| <b>SP-A 2</b>      | <b>(TT+TC)</b>   | 848 (18.5)  |        |        |       |       |        |        |       |       |
|                    | <b>vs CC</b>     | 3735 (81.5) | 0.479  | -0.513 | 1.471 | 0.344 | 0.508  | -0.392 | 1.408 | 0.269 |
|                    | <b>rs1059046</b> |             |        |        |       |       |        |        |       |       |
|                    | <b>(GG+GT)</b>   | 2814 (61.8) |        |        |       |       |        |        |       |       |
|                    | <b>vs TT</b>     | 1741 (38.2) | 0.070  | -0.724 | 0.865 | 0.862 | 0.038  | -0.682 | 0.759 | 0.917 |
| <b>rs1965707</b>   | <b>(AA+AG)</b>   | 2103 (46.2) |        |        |       |       |        |        |       |       |
|                    | <b>vs GG</b>     | 2449 (53.8) | 0.085  | -0.686 | 0.856 | 0.829 | 0.255  | -0.446 | 0.956 | 0.476 |
| <b>rs1965708 )</b> | <b>(TT+TG)</b>   | 1551 (33.8) |        |        |       |       |        |        |       |       |
|                    | <b>vs GG</b>     | 3041 (66.2) | -0.583 | -1.397 | 0.231 | 0.160 | -0.342 | -1.08  | 0.396 | 0.364 |

With adjustment for age, weight, education, area of residence, smoking status, and exposure to environmental tobacco smoke in the last 12 months.

Supplementary tables for ADONIX: Lung function and source specific PM

**Table S6 Interaction between genotype (minor allele carriers) and total and source specific PM on lung function in a linear model**

| Gene                   | SNP              | INTERACTION (p)* |         |                     |                |             |
|------------------------|------------------|------------------|---------|---------------------|----------------|-------------|
|                        |                  | Total            | Traffic | Residential heating | Marine traffic | Industry    |
| <b>FEV<sub>1</sub></b> |                  |                  |         |                     |                |             |
| GSTP1                  | rs1138272        | P>0.1            | P>0.1   | P>0.1               | P>0.1          | 0.05        |
| GSTP1                  | rs596603         | P>0.1            | P>0.1   | P>0.1               | P>0.1          | 0.06        |
| GSTP1                  | rs762803         | P>0.1            | P>0.1   | P>0.1               | P>0.1          | P>0.1       |
| GSTP1                  | rs1695           | P>0.1            | P>0.1   | P>0.1               | P>0.1          | P>0.1       |
| GSTT1                  | rs2266637        | 0.01             | P>0.1   | P>0.1               | P>0.1          | P>0.1       |
| SP-A1                  | <b>rs1136450</b> | P>0.1            | P>0.1   | P>0.1               | P>0.1          | P>0.1       |
| SP-A1                  | rs1136451        | P>0.1            | P>0.1   | P>0.1               | <b>0.04</b>    | <b>0.01</b> |
| SP-A1                  | rs1059057        | 0.05             | P>0.1   | P>0.1               | P>0.1          | P>0.1       |
| SP-A1                  | rs4253527        | P>0.1            | P>0.1   | P>0.1               | <b>0.02</b>    | P>0.1       |
| SP-A2                  | <b>rs1059046</b> | P>0.1            | P>0.1   | P>0.1               | P>0.1          | P>0.1       |
| SP-A2                  | rs1965707        | P>0.1            | P>0.1   | P>0.1               | 0.06           | P>0.1       |
| SP-A2                  | rs1965708        | P>0.1            | P>0.1   | P>0.1               | 0.08           | P>0.1       |
| <b>FVC</b>             |                  |                  |         |                     |                |             |
| GSTP1                  | rs1138272        | P>0.1            | P>0.1   | P>0.1               | P>0.1          | 0.06        |
| GSTP1                  | rs596603         | P>0.1            | P>0.1   | P>0.1               | P>0.1          | 0.07        |
| GSTP1                  | rs762803         | P>0.1            | P>0.1   | P>0.1               | P>0.1          | P>0.1       |
| GSTP1                  | rs1695           | P>0.1            | P>0.1   | P>0.1               | P>0.1          | <b>0.03</b> |
| GSTT1                  | rs2266637        | 0.048            | P>0.1   | P>0.1               | P>0.1          | P>0.1       |
| SP-A1                  | <b>rs1136450</b> | P>0.1            | P>0.1   | P>0.1               | P>0.1          | P>0.1       |
| SP-A1                  | rs1136451        | P>0.1            | P>0.1   | P>0.1               | P>0.1          | 0.03        |
| SP-A1                  | rs1059057        | P>0.1            | 0.07    | 0.08                | P>0.1          | <b>0.01</b> |
| SP-A1                  | rs4253527        | P>0.1            | P>0.1   | P>0.1               | <b>0.03</b>    | P>0.1       |
| SP-A2                  | <b>rs1059046</b> | P>0.1            | P>0.1   | P>0.1               | P>0.1          | P>0.1       |
| SP-A2                  | rs1965707        | P>0.1            | P>0.1   | P>0.1               | P>0.1          | P>0.1       |
| SP-A2                  | rs1965708        | P>0.1            | P>0.1   | P>0.1               | <b>0.03</b>    | P>0.1       |

Interaction models were adjusted for age, weight, education, area of residence, smoking status and exposure to environmental tobacco smoke in the last 12 months.



Supplementary tables for ADONIX: Lung function and source specific PM

**Table S7 Sensitivity analysis - ESTIMATED CHANGE IN FEV<sub>1</sub> AND FVC PER IQR CHANGE IN PM<sub>2.5</sub> FROM traffic in various subgroups of the cohort**

| Linear regression                              | FEV <sub>1</sub> |        |       |          | FVC     |        |       |          |
|------------------------------------------------|------------------|--------|-------|----------|---------|--------|-------|----------|
|                                                | $\beta$          | 95% CI |       | <i>p</i> | $\beta$ | 95% CI |       | <i>p</i> |
|                                                |                  | Lower  | Upper |          |         | Lower  | Upper |          |
| <u>Smoking status</u>                          |                  |        |       |          |         |        |       |          |
| Never smoker                                   | -0.26            | -0.84  | 0.33  | 0.10     | -0.47   | -1.01  | 0.07  | 0.09     |
| Former smoker                                  | -0.10            | -0.83  | 0.61  | 0.50     | -0.33   | -0.98  | 0.31  | 0.31     |
| Current smoker                                 | -1.61            | -2.50  | -0.72 | 0.06     | -0.71   | -1.52  | 0.10  | 0.09     |
| <u>Atopic sensibilisation*</u>                 |                  |        |       |          |         |        |       |          |
| No atopy                                       | -0.84            | 0.13   | 0.08  | <0.00    | -0.36   | -0.80  | 0.08  | 0.03     |
| Atopy                                          | -1.46            | 0.12   | 0.05  | <0.00    | -0.67   | -1.37  | 0.04  | 0.37     |
| <u>Asthma*</u>                                 |                  |        |       |          |         |        |       |          |
| No asthma                                      | -0.38            | -0.79  | 0.04  | 0.07     | -0.44   | -0.82  | -0.06 | 0.02     |
| Asthma                                         | -0.70            | -2.33  | 0.92  | 0.40     | -0.58   | -1.89  | 0.74  | 0.39     |
| <u>Body mass index (BMI. kg/m<sup>2</sup>)</u> |                  |        |       |          |         |        |       |          |
| Underweight (BMI <= 20)                        | 0.41             | -2.06  | 2.88  | 0.74     | 0.22    | -2.11  | 2.55  | 0.85     |
| Normal weight (BMI 0-25)                       | -0.08            | -0.70  | 0.53  | 0.79     | -0.29   | -0.83  | 0.26  | 0.30     |
| Overweight (BMI >25)                           | -0.85            | -1.42  | -0.29 | <0.00    | -0.64   | -1.15  | -0.13 | 0.01     |
| <u>Logistic regression</u>                     |                  |        |       |          |         |        |       |          |
|                                                | OR               | 95% CI |       | <i>p</i> | OR      | 95% CI |       | <i>p</i> |
|                                                |                  | Lower  | Upper |          |         | Lower  | Upper |          |
| <u>Smoking status</u>                          |                  |        |       |          |         |        |       |          |
| Never smoker                                   | 1.43             | 1.08   | 1.90  | 0.01     | 1.38    | 1.04   | 1.85  | 0.03     |
| Former smoker                                  | 1.24             | 0.94   | 1.64  | 0.12     | 1.06    | 0.87   | 1.30  | 0.72     |
| Current smoker                                 | 0.98             | 0.69   | 1.39  | 0.90     | 1.26    | 0.97   | 1.63  | 0.27     |
| <u>Atopic sensibilisation*</u>                 |                  |        |       |          |         |        |       |          |
| No atopy                                       | 1.13             | 0.92   | 1.39  | 0.23     | 1.23    | 0.98   | 1.55  | 0.07     |
| Atopy                                          | 1.38             | 0.98   | 1.95  | 0.06     | 1.26    | 0.98   | 1.62  | 0.26     |
| <u>Asthma**</u>                                |                  |        |       |          |         |        |       |          |
| No asthma                                      | 1.21             | 0.99   | 1.47  | 0.05     | 1.27    | 1.03   | 1.57  | 0.03     |
| Asthma                                         | 1.18             | 0.76   | 1.82  | 0.47     | 1.24    | 0.91   | 1.69  | 0.41     |
| <u>Body mass index (BMI. kg/m<sup>2</sup>)</u> |                  |        |       |          |         |        |       |          |

Supplementary tables for ADONIX: Lung function and source specific PM

|                          |      |      |      |       |      |      |      |      |
|--------------------------|------|------|------|-------|------|------|------|------|
| Underweight (BMI <= 20)  | 1.15 | 0.39 | 3.32 | 0.81  | 1.02 | 0.44 | 2.34 | 0.96 |
| Normal weight (BMI 0-25) | 1.03 | 0.75 | 1.41 | 0.85  | 1.06 | 0.84 | 1.35 | 0.75 |
| Overweight (BMI >25)     | 1.35 | 1.09 | 1.66 | <0.00 | 1.36 | 1.19 | 1.56 | 0.01 |

FEV<sub>1</sub>, forced expiratory volume in 1 second. FVC, forced vital capacity. IQR, interquartile range.  $\beta$  from linear regression models adjusted for age, weight, education, area of residence, and smoking status, excluding the stratification variable in the models stratified for smoking status and BMI. ORs from generalized linear regression models adjusted for age, weight, education, area of residence, and smoking status excluding the stratification variable in the models stratified for smoking status and BMI.

\*Allergy was determined by a positive phadiatop test (IgE >0.35 IU/mL)

\*\*Answering “yes” to “Have you had an asthma attack in the last 12 months?”
